# Supplementary material for: Learning practices of experienced healthcare teams and dyads in acute care settings: a scoping review
Source: HighWire-hosted journal article supplement (doi:10.1136/bmjopen-2022-061144), 2022-07-01
Supplement: bmjopen-2022-061144supp001_data_supplement.pdf [file bmjopen-2022-061144supp001_data_supplement.pdf]

## Appendix 1. Data Extraction Tool

## Hidden Dynamics in Healthcare; Learning Practices that Optimize Expert Dyad Performance in Acute Care Settings: A Scoping Review 2016-2020

## Scoping Review Details

- Name of Reviewer
- Date of Review

## EVIDENCE SOURCE DETAILS &amp; CHARACTERISTICS

1. Citation details: author/s, title, journal, volume, issue, pages
2. Year of publication
3. Location. (please fill in by looking at affiliation of first author)
4. What was the setting of the study?
5. Number of participants enrolled in study
6. What was the profession of the participants enrolled in the study?

## DETAILS/RESULTS EXTRACTED FROM SOURCE OF EVIDENCE.

1. Which learning practices were identified?
2. How were learning practices conducted?
3. How was learning measured?
4. Was there a specific guide for future learning?
5. What was the research design?
6. Was there agreement or controversy from the authors about the efficacy of the learning practices?
7. Were specific learning practices suggested to optimize future learning?
8. Were there gaps identified to the uptake of effective learning practices?
